1     **The flavonoid nobiletin exhibits differential effects on cell viability**  
2             **in keratinocytes exposed to UVA versus UVB radiation**

3                             William Cvammen<sup>1</sup> and Michael G. Kemp<sup>1,2\*</sup>

4     <sup>1</sup>Departments of Pharmacology and Toxicology, Wright State University Boonshoft School of  
5     Medicine, Dayton, Ohio 45435; <sup>2</sup>Dayton Veterans Administration Medical Center, Dayton,  
6                             Ohio 45428

7                             \*Corresponding author e-mail: [mike.kemp@wright.edu](mailto:mike.kemp@wright.edu) (Michael G. Kemp)

8

## 9 **ABSTRACT**

10           The polymethoxylated flavonoid nobiletin has been shown to suppress inflammatory  
11 responses to UVB radiation and to enhance circadian rhythms. Because expression of the core  
12 nucleotide excision repair (NER) factor XPA and the rate of removal of UV photoproducts  
13 from DNA are regulated by the circadian clock, we investigated whether the beneficial effects  
14 of nobiletin in UVB-exposed cells could be due in part to enhanced NER. Though nobiletin  
15 limited UVB-irradiated human keratinocytes from undergoing cell death, we found that this  
16 enhanced survival was not associated with increased NER or XPA expression. Instead,  
17 nobiletin reduced initial UV photoproduct formation and promoted a G1 cell cycle arrest. We  
18 then examined the implications of this findings for exposures to solar radiation through use of  
19 a solar simulated light (SSL) source that contains primarily UVA radiation. In striking contrast  
20 to the results obtained with UVB radiation, nobiletin instead sensitized keratinocytes to both  
21 the SSL and a more defined UVA light source. This enhanced cell death was correlated with a  
22 photochemical change in nobiletin absorption spectrum in the UVA range. We conclude that  
23 nobiletin is unlikely to be a useful compound for protecting keratinocytes against the harmful  
24 effects of solar UV radiation.

25

## 26 INTRODUCTION

27 Ultraviolet-B (UVB) wavelengths of sunlight induce the formation of potentially  
28 mutagenic photoproducts in the DNA of epidermal skin cells and are associated with the  
29 development of both melanoma and non-melanoma skin cancers. Natural products,  
30 synthesized chemicals, and other agents that either absorb this radiation or enhance UV  
31 photoproduct removal therefore have the potential to be used in sunscreens to limit  
32 photocarcinogenesis and photoaging (1, 2). Thus, there is significant interest in identifying  
33 compounds that can be added to sunscreens to increase their effectiveness and reduce the risk  
34 of skin cancer development.

35 One such possible compound is the citrus peel-derived, polymethoxylated flavonoid  
36 nobiletin (NOB), which has been shown to reduce inflammatory responses in human  
37 keratinocytes in vitro and mouse skin in vivo following exposure to UVB radiation (3). In  
38 addition, *C. elegans* treated with NOB exhibit enhanced resistance to UVC radiation and other  
39 stressors (4). Additional studies have found NOB to have antioxidant effects and to inhibit skin  
40 tumor formation in mice exposed to dimethylbenz[a]anthracene (5) or a nitric oxide donor (6).  
41 Thus, these results suggest that the possibility that NOB could be useful in preventing skin  
42 photocarcinogenesis and photoaging associated with UVB exposures.

43 Interestingly, NOB was also recently found to enhance the output of the circadian  
44 transcription machinery (7, 8) via agonism of retinoic acid-related orphan receptors (ROR),  
45 which act on ROR elements in the promoter of the BMAL1 gene to increase gene expression  
46 (9–11). Many aspects of mammalian physiology and biochemistry are known to be under

47 circadian control (12, 13), including the rate of removal of UV photoproducts from DNA by  
48 the nucleotide excision repair (NER) machinery (14, 15). These oscillations in NER activity  
49 have been shown to be correlated with the expression of the core NER protein XPA  
50 throughout the day (16, 17). Thus, the timing of UVB exposure during the day or night  
51 influences both acute erythema and long-term skin carcinogenesis in mice (17, 18). Studies  
52 with human subjects similarly suggest that erythema and XPA expression exhibit circadian  
53 rhythmicity (19, 20).

54           Because of NOB's reported beneficial functions in response to UV radiation (3, 4) and  
55 its ability to modulate circadian rhythms (7, 8), we were therefore curious whether NOB could  
56 be used protect human keratinocytes from UV radiation via BMAL1-mediated enhancement of  
57 XPA expression and UV photoproduct removal. However, we find here that although NOB  
58 reduces UVB lethality, the mechanism appears to be independent of XPA, NER, and effects on  
59 BMAL1 expression. Moreover, the effect of NOB is specific to UVB radiation, as exposure of  
60 NOB-treated cells to UVA or solar simulated UV radiation induces phototoxicity and a  
61 photochemical change in NOB.

## 62 **MATERIALS AND METHODS**

63 **Cell culture:** HaCaT keratinocytes were maintained in DMEM containing 10% FBS, an  
64 additional 2 mM L-glutamine, and penicillin-streptomycin. Telomerase-immortalized human  
65 neonatal foreskin keratinocytes (N-TERTs) (21) were cultured in EpiLife medium containing  
66 human keratinocyte growth supplement (HKGS) (Thermo Fisher Scientific) and  
67 penicillin/streptomycin. Both cell lines were maintained in a 5% CO<sub>2</sub> humidified incubator at

68 37°C and monitored periodically for mycoplasma contamination (Sigma Venor GeM Kit).  
69 Unless otherwise indicated, cells were pre-treated with vehicle (0.2% DMSO) or 50 µM NOB  
70 for 24 hr and then exposed to the indicated UV light source in either culture medium or Hank's  
71 balanced salt solution (HBSS). The UVB light source used two UVP XX-15M bulbs from  
72 Analytik Jena. The solar simulated light (SSL) source used two UVA340 bulbs from Q-Lab  
73 Corporation. Cells were exposed to UVA radiation by placing plates of cells under an inverted  
74 UVP Benchtop UV transilluminator set to the UVA (365 nm) setting. Fluence rates were  
75 determined with an International Light Technologies radiometer and UVB (SED240) or UVA  
76 (ILT72CE) sensors calibrated at 290 and 360 nm, respectively. Spectral properties of the light  
77 sources can be found in **Supplementary Figure S1**.

78 **Assays of cell survival and cell cycle distribution:** Acute cell survival was determined using  
79 methylthiazolyldiphenyl-tetrazolium bromide (MTT), which was added to cell culture medium  
80 at a final concentration of 0.25 mg/ml and incubated for 30 min before solubilization with  
81 DMSO and measurement of absorbance at 570 nm on a Synergy H1 spectrophotometer (Bio-  
82 Tek). Absorbance values for the UV-irradiated samples were normalized to the non-irradiated  
83 samples. Measurements of cell death involved addition of propidium iodide (25 µg/ml) to  
84 unfixed suspensions of trypsinized cells harvested 24 hr after UV exposure. The percentage of  
85 PI-positive (dead) cells was determined using an Accuri C6 flow cytometer. To determine cell  
86 cycle distribution, ethanol-fixed cells were stained with 25 µg/ml propidium iodide after  
87 RNase-treatment and analyzed for DNA content using an Accuri C6 flow cytometer.

88 **DNA immunoblotting:** Cells were treated with vehicle or NOB for 24 hr and then exposed to  
89 200 J/m<sup>2</sup> of UVB radiation. DNA was purified from cells harvested at the indicated time points  
90 using a Mammalian Genomic DNA Miniprep Kit (Sigma). DNA was immobilized on

91 nitrocellulose and analyzed by immunodot blotting with antibodies against cyclobutane  
92 pyrimidine dimers (CPDs; Cosmo Bio NM-DND-001) and single-stranded DNA (Millipore  
93 MAB3034).

94 **Protein immunoblotting:** Cells were lysed in ice-cold Triton X-100 lysis buffer (20 mM Tris-  
95 HCl, pH 7.5, 150 mM NaCl, 1 mM EDTA, 1 mM EGTA, and 1% Triton X-100) supplemented  
96 with 1X HALT protease inhibitor cocktail and incubated on ice for 15-20 min with occasional  
97 vortexing. Lysed cells were centrifuged at maximum speed in a refrigerated microcentrifuge.  
98 Protein lysates were separated on 8% or 15% Tris-Glycine SDS gels and then transferred to a  
99 nitrocellulose membrane using a semi-dry transfer apparatus. Blots were stained with 0.5%  
100 Ponceau S (Sigma) to ensure equal loading. The blots were blocked in in 5% non-fat milk in  
101 TBST (Tris-buffered saline containing 0.1% Tween-20) and then probed overnight with  
102 primary antibodies recognizing XPA, p21, BMAL1 or phosphorylated forms of KAP1, CHK1,  
103 CHK2, or histone H2AX. After washing with TBST, blots were probed with HRP-coupled  
104 anti-mouse or anti-rabbit IgG (Invitrogen) secondary antibodies for one hour at room  
105 temperature. Chemiluminescence was visualized with either Clarity Western ECL substrate  
106 (Bio-Rad) substrate using a Molecular Imager Chemi-Doc XRS+ imaging system (Bio-Rad).  
107 Signals in the linear range of detection were quantified by densitometry using Image Lab (Bio-  
108 Rad) and normalized to the Ponceau S-stained membranes.

109 **Nobiletin absorbance spectra:** The absorbance spectra of nobiletin were determined using a  
110 NanoDrop One spectrophotometer after a 5 hr incubation in either the dark or under the solar  
111 simulated light source.

112

## 113 **RESULTS**

### 114 **Nobiletin limits cell death in UVB-irradiated human keratinocytes**

115 To determine whether NOB can protect keratinocytes from the lethal and/or anti-  
116 proliferative effects of UVB radiation, HaCaT keratinocytes were treated with NOB for 24 hr  
117 prior to exposure to increasing fluences of UVB radiation. As shown in **Figure 1a**, NOB-  
118 treated cells exhibited higher levels of cell survival as measured using an MTT assay. Similar  
119 results were seen in telomerase-immortalized, diploid neonatal (N-TERT) keratinocytes  
120 (**Figure 1b**). Dose-response experiments demonstrated that concentrations of NOB at 50 or  
121 100  $\mu$ M were required to promote UVB survival (**Supplementary Figure S2**). To determine  
122 whether this enhanced proliferation involved changes in cell death, vehicle- and NOB-treated  
123 HaCaT and N-TERT cells were analyzed for changes in cell membrane permeability by  
124 staining of unfixed cells with propidium iodide and analysis by flow cytometry 24 hr after  
125 UVB exposure. The results shown in **Figure 1c, d** demonstrated that NOB treatment resulted  
126 in reduced cell death in both cell lines. Clonogenic survival assays further demonstrated a  
127 protective effect of NOB on long-term proliferative potential in UVB-irradiated HaCaT cells  
128 (**Figure 1e**).

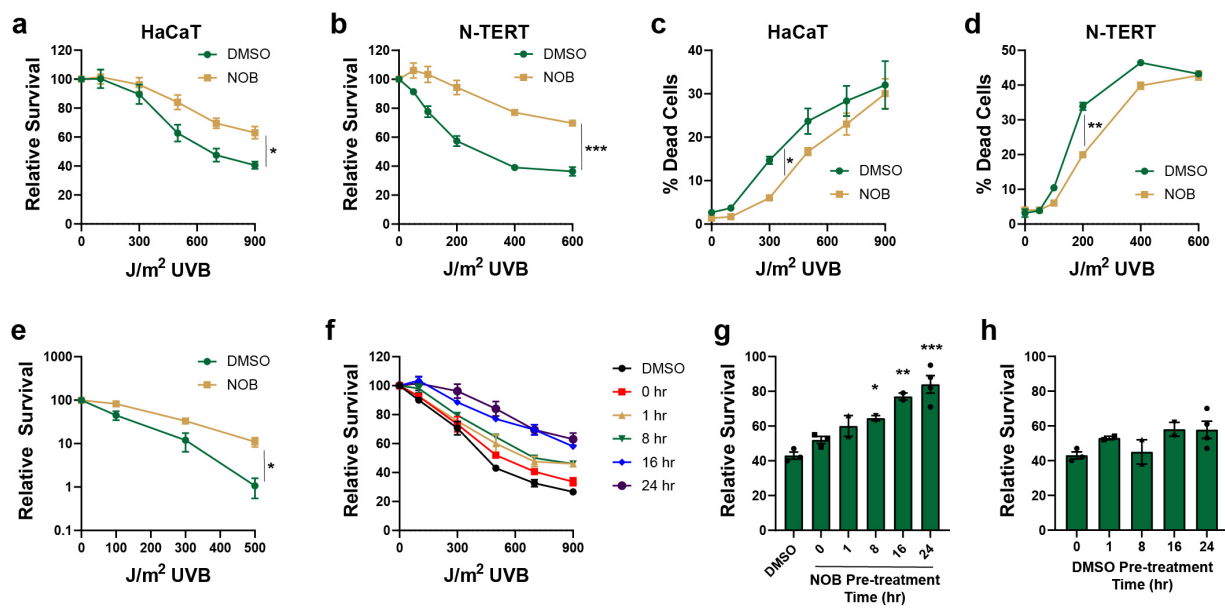

129

130 **Figure 1. Nobletin promotes keratinocyte survival in response to UVB radiation. (a)**

131 HaCaT cells were pre-treated with 50  $\mu$ M nobletin (NOB) for 24 hr before exposure to the

132 indicated fluences of UVB radiation. MTT assays were performed 3 days later. **(b)** MTT

133 assays were repeated as in (a) except with telomerase-immortalized diploid keratinocytes (N-

134 TERTs) and pre-treatment with 100  $\mu$ M NOB. **(c)** Cell death was measured by uptake of

135 propidium iodide (PI) in non-fixed HaCaT treated as in (a) but harvested by trypsinization 24

136 after UVB exposure. **(d)** PI uptake was measured as in (c) except in N-TERT cells. **(e)**

137 Clonogenic cell survival assays were performed in HaCaT cell treated as in (a). Cells were

138 stained with crystal violet 2 weeks after UVB exposure and then quantified. **(f)** HaCaT cells

139 were treated with 50  $\mu$ M NOB for the indicated period of time before UVB exposure. MTT

140 assays were performed 3 days later. **(g)** The relative level of cell survival at the 500 J/m<sup>2</sup> UVB

141 dose in (f) was graphed to show that NOB treatment exhibits a time-dependent promotion of

142 UVB survival. **(h)** Data show the relative level of survival in cells treated with 0.2% DMSO

143 vehicle in experiments performed as in (f). All data represent results from at least 3



144 independent experiments and analysis by one- or two-way ANOVA (\*,  $p < 0.05$ ; \*\*,  $p < 0.01$ ;  
145 \*\*\*,  $p < 0.001$ ).

146

147 If NOB acts in part via agonism of ROR and enhancement of the circadian  
148 transcriptional machinery, then the timing of NOB treatment prior to UVB exposure might be  
149 an important determinant of its effectiveness in mitigating the lethal effects of UVB radiation.  
150 Consistent with this hypothesis, a clear treatment time-dependent effect was observed in UVB-  
151 irradiated HaCaT cells, such that longer periods of pre-treatment with NOB (16 or 24 hr)  
152 resulted in greater cell survival than shorter pre-treatment times (**Figure 1f, g**). Importantly,  
153 this time-dependent effect was not observed with the DMSO vehicle (**Figure 1h**).

154

155 **Nobiletin does not enhance XPA expression or UV photoproduct removal rate but**  
156 **reduces initial UV photoproduct formation and DNA damage response kinase**  
157 **signaling**

158 Because UV photoproduct removal by NER and expression of the NER protein XPA  
159 are controlled by the circadian clock transcriptional machinery (16, 17, 22–24), the activity of  
160 which is stimulated by NOB (7, 8), we next examined whether the pro-survival effect of NOB  
161 was mediated in part via enhanced XPA expression and/or NER rate. However, as shown in  
162 **Figure 2a-b**, treatment of HaCaT cells for 24 hr with NOB did not lead to significant changes  
163 in XPA protein expression. Moreover, NOB treatment instead reduced XPA expression in N-  
164 TERT keratinocytes (**Figure 2c**).

165

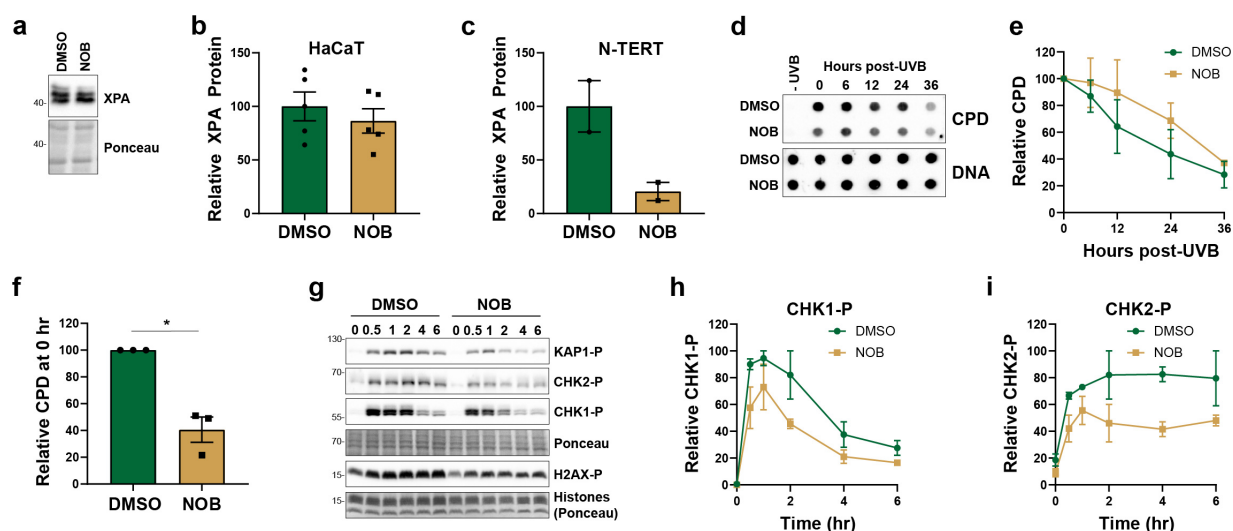

166

167 **Figure 2. Nobiletin does not promote XPA expression or nucleotide excision repair**  
 168 **activity but limits initial UV photoproduct formation. (a)** Representative western blot for  
 169 XPA protein in HaCaT cells treated with 50  $\mu$ M NOB or 0.2% DMSO vehicle for 24 hr. **(b)**  
 170 Quantitation of XPA expression in 5 independent experiments performed as in (a). **(c)**  
 171 Quantitation of XPA expression in two independent experiments performed as in (a) but with  
 172 N-TERT keratinocytes. **(d)** Representative DNA immunoblot showing cyclobutane pyrimidine  
 173 dimer (CPD) formation and repair after exposure of cells treated as in (a) to 200 J/m<sup>2</sup> UVB. **(e)**  
 174 Quantitation of CPD removal from genomic DNA from 3 independent experiments performed  
 175 as in (d). **(f)** Quantitation of initial CPD formation from experiments in (d). Relative CPD  
 176 content was analyzed by one-sample t-test. **(g)** HaCaT cells were treated as in (a), exposed to  
 177 200 J/m<sup>2</sup> UVB, and then harvested at the indicated time points for western blot analysis. **(h, i)**  
 178 Quantitation of CHK1 and CHK2 phosphorylation from 2 independent experiments performed  
 179 as in (g).

180

181

182           To determine whether the activity of the NER system is affected by NOB treatment, we  
183 next analyzed the removal of cyclobutane pyrimidine dimers (CPDs) from DNA in UVB-  
184 irradiated HaCaT cells by DNA immunoblotting. As shown in **Figure 2d-e**, NOB treatment  
185 had no significant effect on the rate of CPD removal from genomic DNA. However, we noted  
186 in our DNA immunoblots in **Figure 2d** that the level of CPD formation at time 0 (immediately  
187 after UVB exposure) was reduced in cells treated with NOB. Quantitation of CPD formation at  
188 this time point from three independent experiments showed that NOB reduced the initial  
189 amount of CPDs that formed in genomic DNA by greater than 50% (**Figure 2f**). Consistent  
190 with reduced CPD formation in NOB-treated cells exposed to UVB radiation, DNA damage  
191 response kinase signaling was partially reduced in NOB-treated cells (**Figure 2g**), which  
192 included phosphorylation of the checkpoint kinases CHK1 and CHK2 (**Figure 2h-i**). Thus, we  
193 conclude from these experiments that NOB treatment leads to reduced CPD formation after  
194 UVB exposure but does not alter the activity of the NER machinery or expression of its key  
195 clock-regulated protein XPA.

196 **Nobiletin treatment leads to an increased number of cells in the G1 phase of the cell**  
197 **cycle in a p21-independent manner**

198           Progression through the cell cycle has also been shown to be under circadian control  
199 (25, 26). We therefore next examined whether NOB altered the distribution of cells throughout  
200 the cell cycle by flow cytometry. As shown in **Figure 3a**, treatment of HaCaT cells with NOB  
201 for 24 hr was associated with increased numbers of cells in the G1 phase of the cell cycle and a  
202 reduced fraction in S and G2 phase. A similar, statistically significant reduction in S phase

203 cells was observed in NOB-treated N-TERT cells (**Figure 3b**). Prolonged treatment of these  
204 cells with high concentrations of NOB led to a noticeable reduction in cell proliferation  
205 without any dramatic changes in cell viability (**Supplementary Figure S3**).

206 The cyclin-dependent kinase inhibitory protein p21 (27), which is known to promote  
207 arrest in G1 of the cell cycle, has been shown to be regulated by BMAL1 (25). However, we  
208 found that NOB treatment did not enhance p21 expression in either HaCaT or N-TERT  
209 keratinocytes (**Figure 3c-e**). Because cells in S phase are more sensitive to UV radiation (28),  
210 we suggest that the enrichment of cells in G1 by NOB treatment may contribute to the  
211 resistance of cells to UVB radiation. However, this effect is likely not mediated by the  
212 previously reported regulation of p21 expression (25).

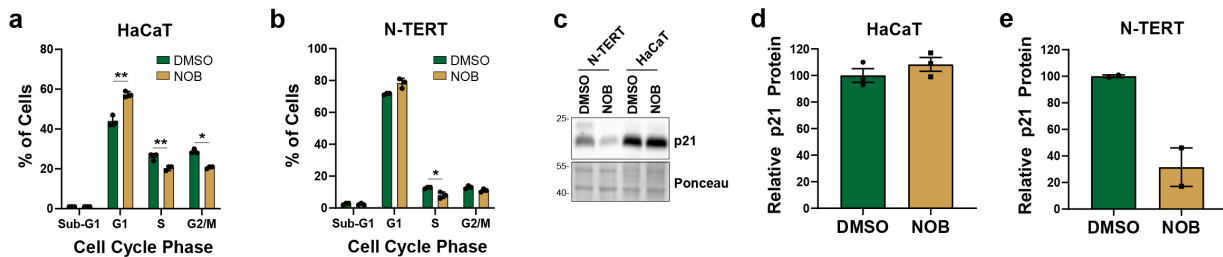

213

214 **Figure 3. NOB alters cell cycle distribution independent of the cyclin-dependent kinase**  
215 **inhibitor protein p21. (a)** HaCaT keratinocytes were treated with vehicle (DMSO) or NOB  
216 for 24 hr. Cell cycle distribution was determined by staining of fixed cells with propidium  
217 iodide and analysis by flow cytometry. **(b)** N-TERT keratinocytes were treated as in (a). Paired  
218 t-tests were used to determine whether NOB induced a significant change in cell cycle  
219 distribution (\*,  $p < 0.05$ ; \*\*,  $p < 0.01$ ). **(c)** Representative western blot for p21 protein in N-  
220 TERT and HaCaT keratinocytes treated with DMSO or NOB for 24 hr. **(d-e)** Quantitation of  
221 p21 protein levels from HaCaT and N-TERTs cells from 2-3 experiments performed as in (c).

222

## 223 **Nobiletin does not enhance BMAL1 protein expression**

224 Because the RORs transcriptionally activate BMAL1 expression (9–11), the increased  
225 UVB survival seen with the ROR agonist NOB treatment might be due promoting BMAL1  
226 expression. However, the results presented thus far indicated to us that NOB may be acting to  
227 protect keratinocytes from UVB radiation via a mechanism that is independent of the known  
228 clock control genes XPA and p21. Consistent with this latter hypothesis, treatment of  
229 keratinocytes with NOB for 24 hr led to only a very modest 8% increase in BMAL1 protein  
230 levels in HaCaT cells (**Figure 4a, b**) and instead led to a 40% decrease in N-TERT cells  
231 (**Figure 4a, c**). Thus, we conclude that NOB promotes keratinocyte survival in response to  
232 UVB radiation by a mechanism that is likely independent of the canonical circadian  
233 transcription machinery. Instead, reduced CPD formation and enhanced G1 cell cycle arrest by  
234 NOB may be responsible for the pro-survival effect of NOB in response to UVB radiation.

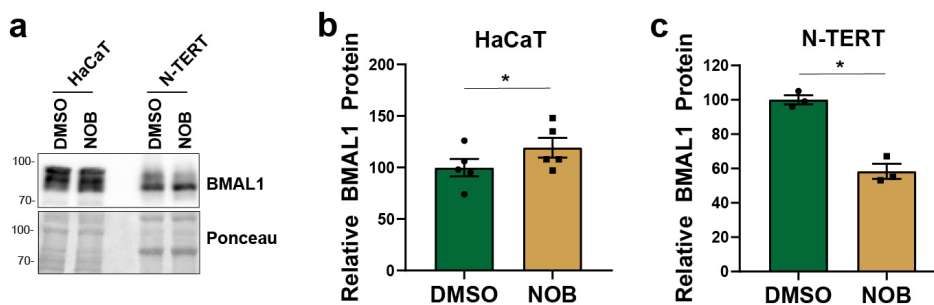

235

## 236 **Figure 4. Nobiletin does not enhance BMAL1 protein expression in human keratinocytes.**

237 (a) Representative western blot for BMAL1 protein in HaCaT and N-TERT cells treated with  
238 DMSO or NOB for 24 hr. (b) Quantitation of BMAL1 expression in HaCaT cells from 5  
239 independent experiments performed as in (a). (c) Quantitation of BMAL1 expression in three

240 independent experiments performed as in (a) but with N-TERT keratinocytes. Ratio t-tests  
241 were used to compare relative BMAL1 protein levels.

242

### 243 **Nobiletin sensitizes keratinocytes to UVA radiation**

244         Though our data indicate NOB promotes UVB survival through a mechanism  
245 inconsistent of enhanced DNA repair, our results nonetheless suggest that NOB could be  
246 useful in mitigating some of the negative consequences of UVB exposure. However, the UVB  
247 light source used in our experiments above does not accurately represent the distribution of  
248 solar UV wavelengths that humans and other terrestrial organisms are routinely exposed to.  
249 We therefore repeated our cell survival assays using a solar simulated light (SSL) source that  
250 is composed of approximately 93% UVA and 7% UVB (29). Interestingly, as shown in **Figure**  
251 **5a**, pre-treatment of HaCaT cells with NOB for 24 hr failed to protect the cells from SSL and  
252 instead greatly sensitized the cells to the anti-proliferative effects of this light source.  
253 Moreover, we noticed that pre-treatment of the cells was not necessary for this sensitization, as  
254 treatment of cells with NOB in either culture media or Hank's balanced salt solution (HBSS)  
255 solely during the period of SSL exposure (and not before or after SSL exposure) led to similar  
256 levels of SSL sensitivity (**Figure 5b, c**). Furthermore, treatment of cells with NOB after SSL  
257 exposure did not significantly sensitize the cells to SSL (**Figure 5d**). Finally, assays measuring  
258 cell death via uptake of propidium iodide in non-fixed cells confirmed that NOB induces  
259 phototoxicity in response to SSL exposure in both HaCaT (**Figure 5e**) and N-TERT  
260 (**Supplementary Figure S4**) keratinocytes.

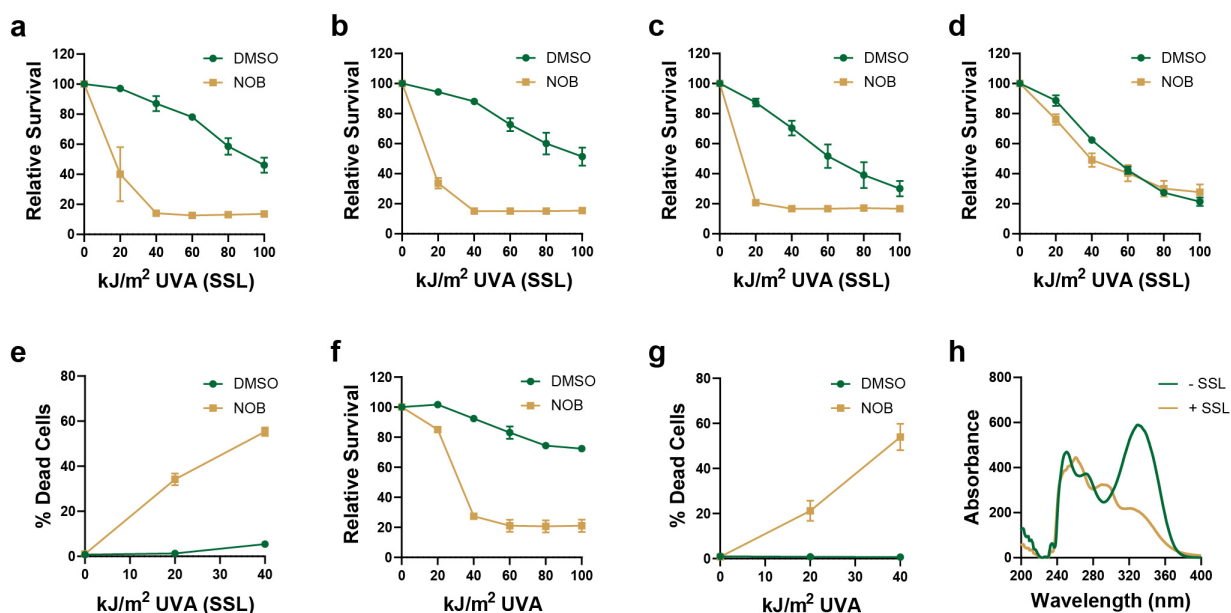

261

262 **Figure 5. Nobiletin sensitizes keratinocytes to UVA radiation.** (a) HaCaT cells were pre-  
 263 treated with 50  $\mu$ M nobiletin (NOB) for 24 hr before exposure to the indicated fluences of  
 264 UVA radiation in a solar simulated light (SSL) source. MTT assays were performed 3 days  
 265 later. (b) MTT assays were repeated as in (a) except that DMSO or NOB was added to cell  
 266 culture medium immediately prior to SSL exposure and then washed at the end of the exposure  
 267 period. (c) Cells were treated as in (b) except that DMSO/NOB was added to Hank's buffered  
 268 salt solution (HBSS) instead of cell culture media. (d) Cells were treated as in (c) except that  
 269 NOB was added to cell culture media after the SSL exposure. (e) Cell death assays were  
 270 performed by measuring propidium iodide uptake in non-fixed cells 24 hr after exposure of  
 271 HaCaT cells SSL in HBSS containing DMSO or NOB. (f) HaCaT cells were treated as in (a)  
 272 except cells were exposed to a UVA light source. (g) Cell death was measured as in (e) except  
 273 with cells exposed to UVA instead of the SSL source. (h) The absorbance spectrum of NOB  
 274 following a 5 hr exposure to the SSL source or incubation in the dark. With the exception of

275 the data in (d), two-way ANOVAs showed that NOB-treated cells exhibited a significant  
276 difference in cell survival.

277

278 To further characterize the differential responses of NOB-treated cells to UVB  
279 radiation versus solar simulated light, we next exposed NOB-treated HaCaT cells to a UVA  
280 light source with less contaminating UVB radiation (**Supplementary Figure S1**). As shown in  
281 **Figure 5g-h**, NOB greatly sensitized the cells to UVA radiation, indicating that the UVA  
282 component of the SSL is responsible for the NOB photosensitization.

283 Our data showing that NOB limits CPD induction by UVB radiation and induces UVA  
284 photosensitization suggests that NOB may be absorbing UVA and UVB wavelengths of light.  
285 We therefore next determined the absorption spectrum of NOB in the absence and presence of  
286 prolonged exposure to SSL. As shown in **Figure 5h**, NOB displayed several absorption peaks  
287 within the UV range, including a major absorption peak at approximately 340 nm (within the  
288 UVA range). No absorption was observed at wavelengths above 400 nm (data not shown).  
289 Interestingly, we observed a time-dependent reduction in the 340 nm absorption peak after  
290 exposure to SSL, such that the peak was nearly completely gone after 5 hr exposure. These  
291 results indicate that NOB undergoes a photochemical change in response to UVA exposure  
292 and that this may be associated with the NOB phototoxicity in the presence of UVA  
293 wavelengths of light. Thus, we conclude that though NOB promotes survival in response to  
294 UVB exposure, it has a strikingly different (and instead toxic) effect in response to light  
295 sources containing significant levels of UVA radiation.

296



## 297 **DISCUSSION**

298           There is great interest in improving the effectiveness of sunscreens to protect  
299 vulnerable individuals from mutagenesis and carcinogenesis associated with exposures to solar  
300 UV radiation, including through the use of natural products and the application of sunscreens  
301 containing DNA repair enzymes (1, 2, 30). Because the natural product NOB has been shown  
302 to enhance the transcriptional output of the circadian transcriptional machinery (7), which is  
303 known to regulate UV photoproduct removal and other UVB DNA damage responses (14, 15,  
304 17), we investigated value of NOB in keratinocyte responses to UV radiation. Though NOB  
305 protected both HaCaT and telomerase-immortalized diploid keratinocytes from UVB radiation,  
306 we found this mechanism to be independent of DNA repair and the core circadian clock  
307 protein BMAL1. Because the effect of NOB on UVB survival was treatment time-dependent  
308 and is associated with decreased UVB photoproduct induction and altered cell cycle  
309 progression, there may be multiple mechanisms by which NOB protects keratinocytes from the  
310 lethal effects of UVB radiation.

311           Though UVB photoprotection is important, we unexpectedly found that NOB instead  
312 sensitizes keratinocytes to UV light sources composed primarily of UVA radiation, which  
313 more closely mimics the distribution of UV light in solar radiation. Our observation that NOB  
314 exhibits a loss in absorbance of NOB at 340 nm after exposure to SSL indicates that the  
315 compound undergoes a photochemical change in response to UVA radiation. The nature of  
316 this change and whether it is responsible for the UVA phototoxicity observed here remains to  
317 be determined. Nonetheless, the results suggest that NOB is not a useful compound for  
318 protecting keratinocytes from solar UV radiation. Thus, studies using UVB light sources along  
319 with NOB treatment should be reviewed with caution. However, the fact that NOB induces a

320 cell cycle arrest could be useful to protect cells from the lethal and mutagenic effects of other  
321 DNA damaging agents and may contribute to the anti-tumor effects of NOB in the context of  
322 treatment with dimethylbenz[a]anthracene (5). Finally, it is also possible that the effects of  
323 NOB may differ in cultured cells that lack circadian synchronization versus cells or other  
324 organ systems in vivo that possess robust circadian rhythmicity.

325

326

327 **ACKNOWLEDGMENTS:** The authors thank the WSU Proteome Analysis Laboratory  
328 and Center for Genomics Research for the use of equipment to carry out this work. This work  
329 was supported by start-up funding provided by Wright State University and by grants from the  
330 National Institute of General Medical Sciences (GM130583), Ohio Cancer Research  
331 Associates (#5020), and the Veterans Administration (I01CX002241).

332

## 333 REFERENCES

- 334 1. Guan, L. L., Lim, H. W. and Mohammad, T. F. (2021) Sunscreens and Photoaging: A  
335 Review of Current Literature. *Am. J. Clin. Dermatol.* **22**, 819–828.  
336 <https://doi.org/10.1007/s40257-021-00632-5>.
- 337 2. Boo, Y. C. (2020) Emerging Strategies to Protect the Skin from Ultraviolet Rays Using  
338 Plant-Derived Materials. *Antioxidants (Basel, Switzerland)* **9**.  
339 <https://doi.org/10.3390/antiox9070637>.
- 340 3. Tanaka, S., Sato, T., Akimoto, N., Yano, M. and Ito, A. (2004) Prevention of UVB-induced  
341 photoinflammation and photoaging by a polymethoxy flavonoid, nobiletin, in human  
342 keratinocytes in vivo and in vitro. *Biochem. Pharmacol.* **68**, 433–439.  
343 <https://doi.org/10.1016/j.bcp.2004.04.006>.
- 344 4. Yang, X., Wang, H., Li, T., Chen, L., Zheng, B. and Liu, R. H. (2020) Nobiletin Delays  
345 Aging and Enhances Stress Resistance of *Caenorhabditis elegans*. *Int. J. Mol. Sci.* **21**.  
346 <https://doi.org/10.3390/ijms21010341>.
- 347 5. Murakami, A., Nakamura, Y., Torikai, K., Tanaka, T., Koshihara, T., Koshimizu, K.,

- 348 Kuwahara, S., Takahashi, Y., Ogawa, K., Yano, M., Tokuda, H., Nishino, H., Mimaki, Y.,  
349 Sashida, Y., Kitanaka, S. and Ohigashi, H. (2000) Inhibitory effect of citrus nobiletin on  
350 phorbol ester-induced skin inflammation, oxidative stress, and tumor promotion in mice.  
351 *Cancer Res.* **60**, 5059–5066.
- 352 6. Iwase, Y., Takemura, Y., Ju-ichi, M., Yano, M., Ito, C., Furukawa, H., Mukainaka, T.,  
353 Kuchide, M., Tokuda, H. and Nishino, H. (2001) Cancer chemopreventive activity of  
354 3,5,6,7,8,3',4'-heptamethoxyflavone from the peel of citrus plants. *Cancer Lett.* **163**, 7–9.  
355 [https://doi.org/10.1016/s0304-3835\(00\)00691-1](https://doi.org/10.1016/s0304-3835(00)00691-1).
- 356 7. Tanaka, S., Sato, T., Akimoto, N., Yano, M., Ito, A., Murakami, A., Nakamura, Y., Torikai,  
357 K., Tanaka, T., Koshihara, T., Koshimizu, K., Kuwahara, S., Takahashi, Y., Ogawa, K.,  
358 Yano, M., Tokuda, H., Nishino, H., Mimaki, Y., Sashida, Y., Kitanaka, S., Ohigashi, H.,  
359 He, B., Nohara, K., Park, N., Park, Y. S., Guillory, B., Zhao, Z., Garcia, J. M., Koike, N.,  
360 Lee, C. C., Takahashi, J. S., Yoo, S. H., Chen, Z., Gabros, S., Nessel, T. A. and Zito, P. M.  
361 (2016) The Small Molecule Nobiletin Targets the Molecular Oscillator to Enhance  
362 Circadian Rhythms and Protect against Metabolic Syndrome. *Cell Metab.* **23**, 610–621.  
363 <https://doi.org/10.1016/j.cmet.2016.03.007> [doi].
- 364 8. Shinozaki, A., Misawa, K., Ikeda, Y., Haraguchi, A., Kamagata, M., Tahara, Y. and Shibata,  
365 S. (2017) Potent Effects of Flavonoid Nobiletin on Amplitude, Period, and Phase of the  
366 Circadian Clock Rhythm in PER2::LUCIFERASE Mouse Embryonic Fibroblasts. *PLoS*  
367 *One* **12**, e0170904. <https://doi.org/10.1371/journal.pone.0170904> [doi].
- 368 9. Guillaumond, F., Dardente, H., Giguère, V. and Cermakian, N. (2005) Differential control  
369 of Bmal1 circadian transcription by REV-ERB and ROR nuclear receptors. *J. Biol.*  
370 *Rhythms* **20**, 391–403. <https://doi.org/10.1177/0748730405277232>.
- 371 10. Akashi, M. and Takumi, T. (2005) The orphan nuclear receptor ROR $\alpha$  regulates  
372 circadian transcription of the mammalian core-clock Bmal1. *Nat. Struct. Mol. Biol.* **12**,  
373 441–448. <https://doi.org/10.1038/nsmb925>.
- 374 11. Sato, T. K., Panda, S., Miraglia, L. J., Reyes, T. M., Rudic, R. D., McNamara, P., Naik, K.  
375 A., FitzGerald, G. A., Kay, S. A. and Hogenesch, J. B. (2004) A functional genomics  
376 strategy reveals Rora as a component of the mammalian circadian clock. *Neuron* **43**, 527–  
377 537. <https://doi.org/10.1016/j.neuron.2004.07.018>.
- 378 12. Mohawk, J. A., Green, C. B. and Takahashi, J. S. (2012) Central and peripheral circadian  
379 clocks in mammals. *Annu. Rev. Neurosci.* **35**, 445–462. <https://doi.org/10.1146/annurev-neuro-060909-153128>.
- 381 13. Takahashi, J. S. (2017) Transcriptional architecture of the mammalian circadian clock. *Nat.*  
382 *Rev.* **18**, 164–179. <https://doi.org/10.1038/nrg.2016.150> [doi].
- 383 14. Dakup, P. and Gaddameedhi, S. (2017) Impact of the Circadian Clock on UV-Induced  
384 DNA Damage Response and Photocarcinogenesis. *Photochem. Photobiol.* **93**, 296–303.  
385 <https://doi.org/10.1111/php.12662> [doi].
- 386 15. Lubov, J. E., Cvammen, W. and Kemp, M. G. (2021) The Impact of the Circadian Clock  
387 on Skin Physiology and Cancer Development. *Int. J. Mol. Sci.* **22**.  
388 <https://doi.org/10.3390/ijms22116112>.
- 389 16. Kang, T. H., Reardon, J. T., Kemp, M. and Sancar, A. (2009) Circadian oscillation of  
390 nucleotide excision repair in mammalian brain. *Proc. Natl. Acad. Sci. U. S. A.* **106**, 2864–  
391 2867. <https://doi.org/10.1073/pnas.0812638106>.
- 392 17. Gaddameedhi, S., Selby, C. P., Kaufmann, W. K., Smart, R. C. and Sancar, A. (2011)  
393 Control of skin cancer by the circadian rhythm. *Proc. Natl. Acad. Sci. U. S. A.* **108**, 18790–

- 394 18795. <https://doi.org/10.1073/pnas.1115249108>; 10.1073/pnas.1115249108.
- 395 18. Gaddameedhi, S., Selby, C. P., Kemp, M. G., Ye, R. and Sancar, A. (2015) The circadian  
396 clock controls sunburn apoptosis and erythema in mouse skin. *J. Invest. Dermatol.* **135**,  
397 1119–1127. <https://doi.org/10.1038/jid.2014.508> [doi].
- 398 19. Guan, L., Suggs, A., Ahsanuddin, S., Tarrillion, M., Selph, J., Lam, M. and Baron, E.  
399 (2016) 2016 Arte Poster Competition First Place Winner: Circadian Rhythm and UV-  
400 Induced Skin Damage: An In Vivo Study. *J. Drugs Dermatol.* **15**, 1124–1130.  
401 <https://doi.org/S1545961616P1124X> [pii].
- 402 20. Nikkola, V., Grönroos, M., Huotari-Orava, R., Kautiainen, H., Ylianttila, L., Karppinen,  
403 T., Partonen, T. and Snellman, E. (2018) Circadian Time Effects on NB-UVB-Induced  
404 Erythema in Human Skin In Vivo. *J. Invest. Dermatol.* **138**, 464–467.  
405 <https://doi.org/10.1016/j.jid.2017.08.016>.
- 406 21. Dickson, M. A., Hahn, W. C., Ino, Y., Ronfard, V., Wu, J. Y., Weinberg, R. A., Louis, D.  
407 N., Li, F. P. and Rheinwald, J. G. (2000) Human keratinocytes that express hTERT and  
408 also bypass a p16(INK4a)-enforced mechanism that limits life span become immortal yet  
409 retain normal growth and differentiation characteristics. *Mol. Cell. Biol.* **20**, 1436–1447.
- 410 22. Kang, T. H., Lindsey-Boltz, L. A., Reardon, J. T. and Sancar, A. (2010) Circadian control  
411 of XPA and excision repair of cisplatin-DNA damage by cryptochrome and HERC2  
412 ubiquitin ligase. *Proc. Natl. Acad. Sci. U. S. A.* **107**, 4890–4895.  
413 <https://doi.org/10.1073/pnas.0915085107> [doi].
- 414 23. Kang, T. H., Reardon, J. T. and Sancar, A. (2011) Regulation of nucleotide excision repair  
415 activity by transcriptional and post-transcriptional control of the XPA protein. *Nucleic  
416 Acids Res.* **39**, 3176–3187. <https://doi.org/10.1093/nar/gkq1318>; 10.1093/nar/gkq1318.
- 417 24. Park, J. M. and Kang, T. H. (2016) Transcriptional and Posttranslational Regulation of  
418 Nucleotide Excision Repair: The Guardian of the Genome against Ultraviolet Radiation.  
419 *Int. J. Mol. Sci.* **17**, E1840. <https://doi.org/E1840> [pii].
- 420 25. Gréchez-Cassiau, A., Rayet, B., Guillaumond, F., Teboul, M. and Delaunay, F. (2008) The  
421 circadian clock component BMAL1 is a critical regulator of p21WAF1/CIP1 expression  
422 and hepatocyte proliferation. *J. Biol. Chem.* **283**, 4535–4542.  
423 <https://doi.org/10.1074/jbc.M705576200>.
- 424 26. Matsuo, T., Yamaguchi, S., Mitsui, S., Emi, A., Shimoda, F. and Okamura, H. (2003)  
425 Control mechanism of the circadian clock for timing of cell division in vivo. *Science* **302**,  
426 255–259. <https://doi.org/10.1126/science.1086271>.
- 427 27. El-Deiry, W. S. (2016) p21(WAF1) Mediates Cell-Cycle Inhibition, Relevant to Cancer  
428 Suppression and Therapy. *Cancer Res.* **76**, 5189–5191. [https://doi.org/10.1158/0008-  
429 5472.CAN-16-2055](https://doi.org/10.1158/0008-5472.CAN-16-2055) [doi].
- 430 28. Riddle, J. C. and Hsie, A. W. (1978) An effect of cell-cycle position on ultraviolet-light-  
431 induced mutagenesis in Chinese hamster ovary cells. *Mutat. Res.* **52**, 409–420.  
432 [https://doi.org/10.1016/0027-5107\(78\)90179-3](https://doi.org/10.1016/0027-5107(78)90179-3).
- 433 29. Dickinson, S. E., Khawam, M., Kirschnerova, V., Vaishampayan, P., Centuori, S. M.,  
434 Saboda, K., Calvert, V. S., Petricoin, E. F. 3rd and Curiel-Lewandrowski, C. (2021)  
435 Increased PD-L1 Expression in Human Skin Acutely and Chronically Exposed to UV  
436 Irradiation. *Photochem. Photobiol.* **97**, 778–784. <https://doi.org/10.1111/php.13406>.
- 437 30. Yarosh, D. B., Rosenthal, A. and Moy, R. (2019) Six critical questions for DNA repair  
438 enzymes in skincare products: a review in dialog. *Clin. Cosmet. Investig. Dermatol.* **12**,  
439 617–624. <https://doi.org/10.2147/CCID.S220741>.
